# Supplementary material for: Discriminating Microbial Community Structure Between Peri-Implantitis and Periodontitis With Integrated Metagenomic, Metatranscriptomic, and Network Analysis
Source: Front Cell Infect Microbiol. 2020 Dec 11;10:596490. doi: 10.3389/fcimb.2020.596490 (PMC7793907; doi:10.3389/fcimb.2020.596490)
Supplement: Supplementary file 4 [file Table_3.xlsx]

## Sheet: Supplementary Table S3
Supplementary Table S3. Clinical data of subjects of metatranscriptome
Subject				Peri-implantitis											Periodontitis
ID	Age	Gender		Position	Deepest probing depth (mm)	BOP	SUP	Bone loss (%)	KM ≧ 2mm	Years in function	Prsothesis type	Connection type			Position	Deepest probing depth (mm)	BOP	SUP	Bone loss (%)	KM ≧ 2mm
												IN/EX	BL/TL
1	65	M		Mandibular posterior	6	+	-	40	No	7	Cemented	IN	BL		Mandibular posterior	5	+	-	26.4	Yes
2	58	F		Maxillary anterior	5	+	+	44.4	No	4	Cemented	IN	BL		Maxillary posterior	7	+	-	43.3	Yes
3	63	M		Mandibular posterior	5	+	-	26.3	No	3	Unknown	EX	BL		Maxillary posterior	13	+	-	85.8	No
4	80	F		Mandibular posterior	8	+	+	54.3	No	10	Screwed	EX	BL		Maxillary posterior	8	+	-	57.3	Yes
5	65	F		Mandibular posterior	10	+	+	53	Yes	10	Cemented	IN	BL		Maxillary anteior	11	+	+	79.3	Yes
6	67	F		Maxillary posterior	13	+	-	79.4	No	13	Cemented	EX	BL		Mandibular anterior	5	+	-	66.4	Yes
7	69	M		Maxillary posterior	8	+	-	47.1	Yes	10	Cemented	IN	BL		Mandibular posterior	5	+	-	53.1	Yes
8	64	F		Maxillary anterior	11	+	-	55.6	Yes	30	Screwed	EX	BL		Maxillary posterior	7	+	-	50	Yes
9	68	M		Maxillary posterior	5	+	-	28.6	No	3	Unknown	EX	BL		Mandibular posterior	8	+	+	60	Yes
10	60	F		Mandibular posterior	7	+	-	60.3	No	3	Unknown	EX	BL		Maxillary posterior	15	+	+	72.1	Yes
11	49	M		Maxillary posterior	15	+	+	88.7	No	4	Cemented	One-piece	BL		Maxillary posterior	7	+	-	70.4	Yes
12	66	F		Maxillary posterior	10	+	-	68.8	No	6	Unknown	IN	BL		Maxillary posterior	8	+	-	66.7	No
Mean ± SD	64.5 ± 7.0	-		-	8.5 ± 3.2	-	-	53.8 ± 18.7	-	8.5 ± 7.5	-	-			-	8.2 ± 3.1	-	-	60.9 ± 16.3	-
BOP: bleedin og probing
SUP: suppuration
KM: keratinized mucosa
IN: internal connection
EX: external connection
BL: bone level
TL:tissue level
